# Supplementary material for: Effects of 440-Hz vs. 432-Hz preferred music frequencies, during warm-up, on intermittent anaerobic speed test performance in men and women kickboxers: a double-blind crossover study
Source: PeerJ. 2025 Mar 6;13:e19084. doi: 10.7717/peerj.19084 (PMC11890291; doi:10.7717/peerj.19084)
Supplement: Supplemental Information 1 [file peerj-13-19084-s001.xlsx]

## Sheet: etude 2
Sexe	age	Weight	height	BMI	Experience	Kast test
						control														PM440Hz														PM432Hz
						S1	S2	S3	S4	S5	Total time	Best time	Fatigue index	Maximal impact speed	HRmean	HRpeak	RPEpost-test	Feeling scale post-test	Blood lactate	S1	S2	S3	S4	S5	Total time	Best time	Fatigue index	Maximal impact speed	HRmean	HRpeak	RPEpost-test	Feeling scale post-test	Blood lactate	S1	S2	S3	S4	S5	Total time	Best time	Fatigue index	Maximal impact speed	HRmean	HRpeak	RPEpost-test	Feeling scale post-test	Blood lactate
Women	19	48.2	1.6	18.8281	4.5	10.42	10.48	10.51	10.55	10.66	52.63	10.42	-1.01	39.19	173	187	8	2	5.3	9.94	9.96	10.06	10.11	10.13	50.21	9.94	-1.02	39.72	171	185	6	4	5.4	10.04	10.183	10.293	10.29	10.31	51.12	10.04	-1.82	39.72	170	184	7	3	5.3
Women	18	42.5	1.51	18.6395	3	10.57	10.65	10.68	10.72	10.81	53.44	10.57	-1.11	37.91	169	186	9	2	5.6	10.09	10.13	10.23	10.28	10.28	51.02	10.09	-1.12	38.44	167	184	7	4	5.8	10.37	10.363	10.453	10.45	10.49	52.13	10.36	-0.6	38.44	166	183	8	3	5.6
Women	17	52.3	1.65	19.2103	3	11.9	11.98	12.01	12.05	12.18	60.12	11.9	-1.05	32.09	166	183	9	1	5.1	11.42	11.46	11.56	11.61	11.66	57.7	11.42	-1.06	32.62	164	181	7	3	5.2	11.57	11.687	11.827	11.78	11.82	58.68	11.57	-1.44	32.62	163	180	8	1	5
Women	18	50.75	1.6	19.8242	5	10.29	10.37	10.38	10.42	10.56	52.01	10.29	-1.1	37.47	170	180	8	2	5.5	9.82	9.89	9.93	9.98	10.03	49.64	9.82	-1.11	38	168	178	6	4	5.4	9.95	10.097	10.237	10.22	10.29	50.79	9.95	-2.1	38	167	177	7	3	5.3
Women	18	63	1.7	21.7993	5	10.4	10.51	10.54	10.57	10.72	52.74	10.4	-1.43	38.62	168	181	8	2	7	9.93	10.03	10.06	10.14	10.25	50.4	9.93	-1.52	39.15	166	179	6	4	6.8	10.47	10.257	10.397	10.33	10.43	51.88	10.26	-1.17	39.15	165	178	7	3	6.9
Women	19	37.25	1.54	15.7067	3	10.25	10.36	10.39	10.43	10.57	51.99	10.25	-1.45	38.23	160	179	9	3	6.1	9.78	9.88	9.91	9.98	10.1	49.65	9.78	-1.54	38.76	158	177	7	5	6.3	10	10.107	10.247	10.18	10.28	50.81	10	-1.63	38.76	157	176	8	4	6.2
Women	17	65	1.8	20.0617	4	10.64	10.75	10.81	10.85	10.96	54	10.64	-1.51	39.22	177	188	7	2	7	10.17	10.27	10.33	10.41	10.49	51.66	10.17	-1.6	39.63	175	183	5	4	6.7	10.17	10.527	10.637	10.57	10.67	52.57	10.17	-3.39	39.63	174	185	6	3	6.8
Women	16	44.8	1.52	19.3906	5	10.68	10.79	10.82	10.89	11.05	54.23	10.68	-1.56	33.14	167	183	9	2	4.2	10.21	10.31	10.34	10.37	10.58	51.81	10.21	-1.49	33.55	165	181	7	4	4.1	10.5	10.501	10.661	10.54	10.64	52.84	10.5	-0.65	33.55	164	180	8	3	4
Women	19	63.4	1.62	24.1579	4	10.26	10.37	10.4	10.47	10.63	52.13	10.26	-1.62	38.14	163	180	7	3	4.7	9.79	9.89	9.92	9.95	10.16	49.71	9.79	-1.56	38.55	161	178	6	5	4.5	10.06	10.081	10.241	10.12	10.22	50.72	10.06	-0.84	38.55	160	177	5	3	4.8
Women	17	57.9	1.55	24.0999	4	10.75	10.86	10.95	11.02	11.18	54.76	10.75	-1.88	32.29	169	186	9	3	7	10.28	10.38	10.47	10.5	10.71	52.34	10.28	-1.83	32.7	167	184	8	5	6.9	10.43	10.631	10.791	10.61	10.71	53.17	10.43	-1.96	32.7	166	183	7	4	7.1
Women	19	69	1.75	22.5306	5	10.26	10.43	10.46	10.52	10.68	52.34	10.26	-2.03	37.98	173	187	7	3	5.2	9.79	9.95	9.98	9.995	10.21	49.92	9.79	-1.98	38.39	171	185	6	5	5.1	10.28	10.125	10.285	10.12	10.28	51.09	10.12	-0.97	38.39	170	184	5	4	5.2
Women	18	71.8	1.7	24.8443	3.5	10.19	10.27	10.33	10.39	10.55	51.72	10.19	-1.51	38.93	169	186	9	2	5	9.72	9.79	9.85	9.87	10.08	49.3	9.72	-1.44	39.34	167	184	8	4	4.8	10.2	10.015	10.175	10.07	10.14	50.6	10.02	-1.05	39.34	166	183	7	3	5
Women	20	71.3	1.66	25.8746	2.5	10.98	11.02	11.05	11.11	11.27	55.42	10.98	-0.95	37.96	166	183	8	1	5.3	10.51	10.54	10.57	10.59	10.8	53	10.51	-0.86	38.35	163	181	7	3	5.2	10.8	10.735	10.895	10.86	10.89	54.18	10.74	-0.94	38.37	163	178	6	3	5.3
Men	19	48.7	1.53	20.804	5	9.07	9.13	9.16	9.2	9.29	45.86	9.07	-1.12	37.61	170	180	8	2	5.2	8.59	8.61	8.71	8.76	8.76	43.44	8.59	-1.13	38	167	182	7	3	5.4	8.91	8.833	8.923	8.94	8.96	44.57	8.83	-0.91	38	168	177	8	4	5.25
Men	23	60.3	1.78	19.0317	5	9.23	9.29	9.32	9.36	9.45	46.66	9.23	-1.1	44.62	168	181	8	3	6.6	8.75	8.77	8.87	8.92	8.92	44.24	8.75	-1.11	45.01	165	183	7	4	6.4	9.07	8.993	9.083	9.1	9.12	45.37	8.99	-0.89	45.01	166	178	8	5	6.3
Men	17	68.2	1.77	21.769	5	9.43	9.49	9.52	9.56	9.65	47.66	9.43	-1.07	44.64	160	179	9	2	5.2	8.95	8.97	9.07	9.12	9.12	45.24	8.95	-1.09	45.03	157	181	8	3	5.1	9.27	9.193	9.283	9.3	9.32	46.37	9.19	-0.87	45.03	158	176	9	4	5
Men	18	67.9	1.8	20.9568	4	9.17	9.23	9.26	9.3	9.39	46.36	9.17	-1.1	44.61	177	188	8	2	7	8.69	8.71	8.81	8.86	8.86	43.94	8.69	-1.12	45	174	184	6	3	6.8	9.01	8.933	9.023	9.04	9.06	45.07	8.93	-0.9	45	175	185	8	4	6.7
Men	17	70.45	1.79	21.9875	6	9.33	9.39	9.42	9.46	9.55	47.16	9.33	-1.08	44.28	167	183	9	3	5.1	8.85	8.87	8.97	9.02	9.02	44.74	8.85	-1.1	45	164	185	7	4	5.2	9.17	9.093	9.183	9.2	9.22	45.87	9.09	-0.88	44.67	165	180	9	5	5
Men	19	63.8	1.76	20.5966	5	9.59	9.65	9.68	9.72	9.81	48.46	9.59	-1.06	39.51	163	180	7	3	6	9.11	9.13	9.23	9.28	9.28	46.04	9.11	-1.07	40.23	160	182	5	4	6.2	9.43	9.353	9.443	9.46	9.48	47.17	9.35	-0.86	39.9	161	177	6	5	6.3
Men	21	69.9	1.8	21.5741	5	9.78	9.84	9.87	9.91	10	49.41	9.78	-1.03	41.93	169	186	9	2	5.8	9.3	9.32	9.42	9.47	9.47	46.99	9.3	-1.05	42.65	166	179	7	3	5.5	9.62	9.543	9.633	9.65	9.67	48.12	9.54	-0.84	42.65	167	183	8	4	5.7
Men	16	60.2	1.7	20.8304	4	10.1	10.16	10.19	10.23	10.32	51.01	10.1	-1	42.02	168	181	8	1	7.1	9.62	9.64	9.74	9.79	9.79	48.59	9.62	-1.01	42.74	165	183	6	2	6.8	9.94	9.863	9.953	9.97	9.99	49.72	9.86	-0.81	42.74	166	178	7	3	7
Men	20	65	1.79	20.2865	6	8.9	8.96	8.99	9.033	9.12	45.01	8.9	-1.14	45.18	160	179	9	2	5.2	8.42	8.44	8.54	8.59	8.59	42.59	8.42	-1.15	46	157	181	7	4	5.4	8.74	8.663	8.753	8.77	8.79	43.72	8.66	-0.93	45.9	158	176	8	3	5.4
Men	19	70	1.78	22.0932	3	10.06	10.23	10.26	10.331	10.491	51.37	10.06	-2.13	39.21	177	188	10	3	5.3	9.59	9.75	9.78	9.81	10.02	48.95	9.59	-2.09	40.03	174	180	8	5	5	9.98	9.941	10.101	9.92	10.08	50.02	9.92	-0.85	39.93	175	185	9	4	5.2
Men	19	73	1.83	21.7982	3.5	9.88	10.05	10.08	10.14	10.295	50.44	9.88	-2.11	42.51	167	183	8	2	5.1	9.41	9.57	9.6	9.62	9.83	48.02	9.41	-2.06	43.33	164	185	6	4	5.3	9.8	9.745	9.905	9.74	9.9	49.09	9.74	-0.8	43.23	165	180	7	2	5.4
Men	22	80	1.9	22.1607	4	10.45	10.56	10.59	10.633	10.72	52.96	10.45	-1.35	38.75	163	180	8	2	4.8	9.97	10.04	10.14	10.19	10.19	50.54	9.97	-1.38	39.57	160	182	7	4	4.9	10.05	10.263	10.353	10.32	10.39	51.38	10.05	-2.24	39.47	161	177	6	2	5
Men	19	66	1.77	21.0667	3.5	10.41	10.49	10.53	10.573	10.66	52.67	10.41	-1.18	38.32	169	186	9	3	5.6	9.93	9.97	10.08	10.13	10.13	50.25	9.93	-1.2	38.98	166	180	8	5	5.4	10.06	10.213	10.303	10.29	10.33	51.2	10.06	-1.78	39.04	167	183	7	4	5.4
Men	20	81	1.85	23.6669	4	10.4	10.46	10.49	10.533	10.64	52.53	10.4	-1.01	38.37	173	187	7	3	5.9	9.92	9.94	10.04	10.09	10.11	50.11	9.92	-1.02	39.03	170	181	6	4	5.7	10.14	10.163	10.273	10.27	10.29	51.14	10.14	-0.86	39.09	171	184	5	4	5.6
Men	24	70	1.79	21.847	4	9.96	10.04	10.07	10.107	10.25	50.42	9.96	-1.25	42.35	169	186	9	3	6.3	9.49	9.56	9.62	9.67	9.72	48.05	9.49	-1.27	43.01	166	188	8	4	6.1	9.8	9.747	9.887	9.85	9.92	49.2	9.75	-0.96	43.07	167	183	7	4	6.3
